# Supplementary material
Source: Research Square preprint supplement (doi:10.21203/rs.3.rs-9689852/v1)
Supplement: Supplementary file 1 [file 0f9ac3d1d9b5cd59452cd482.docx]

**Supplementary Material**

Table S1. Missing Data and Case Flow for ROC Analysis

| **Item** | **Value / method** | **Comment** |
| --- | --- | --- |
| Baseline sample | **N = 14,050** | Total recruited (April 2022–Sept 2023). |
| Follow-up eGFR available | **n = 632** | Cases with any follow-up eGFR recorded (SPSS output: NOT MISSING (eGFR_FUP_60)). |
| Cases used in ROC / final model | **n = 570** (Positive = 521; Negative = 49) | ROC Case processing summary: 521 (eGFR ≥60), 49 (eGFR <60). SPSS used MISSING=EXCLUDE (listwise). |
| Missing (excluded from ROC) | **13,480** | 14,050 total − 570 used in ROC = 13,480 excluded (due to missing follow-up and/or covariates). |
| Primary missing-data approach | **Complete-case (listwise) analysis** | LOGISTIC and ROC runs used /MISSING=EXCLUDE. |
| Additional sensitivity approaches | **Missing-indicator models; unweighted vs weighted comparisons** | These were run and compared with complete-case results (see AOR change row). |
| CKD prevalence (weighted, paper) | **8.9%** (eGFR <60; survey-weighted) | Reported in main Results. |
| CKD prevalence (ROC sample) | **49/570 = 8.6%** | Comparable to weighted prevalence — indicates no major shift in prevalence in the analytic sample. |
| AUC (ROC) | **0.777 (95% CI 0.701–0.853; p<0.001)** | Predictive discrimination of the final multivariable model. |
| Chosen optimal cut-off (Youden index approx.) | **Predicted probability = 0.830996** | Derived from ROC coordinates (see SPSS output row at 0.8309958). |
| Sensitivity at cut-off | **90.0%** | True positive rate at chosen cut-off (from ROC table). |
| Specificity at cut-off | **53.1%** | True negative rate = 1 − (1 − specificity) shown in ROC output. |
| Balanced accuracy | **71.6%** | (Sensitivity + Specificity) / 2 = (0.900 + 0.531)/2. |
| Effect on principal AORs | **Minimal change (< ~5%)** | AORs for main predictors (HTN, DM, herbal medicine, private water, BMI) remained directionally consistent across complete-case, missing-indicator and unweighted models. |

Table S2. Sensitivity Analysis for Predictive Model Performance

| **Parameter** | **Value** |
| --- | --- |
| Area Under Curve (AUC) | 0.777 (0.701–0.853) |
| Standard Error | 0.039 |
| p-value (AUC ≠ 0.5) | <0.001 |
| Sensitivity (optimal region ≈0.77 cutoff) | ~0.95 |
| Specificity (approximate) | ~0.39 |
| Missing data approach | Complete-case |


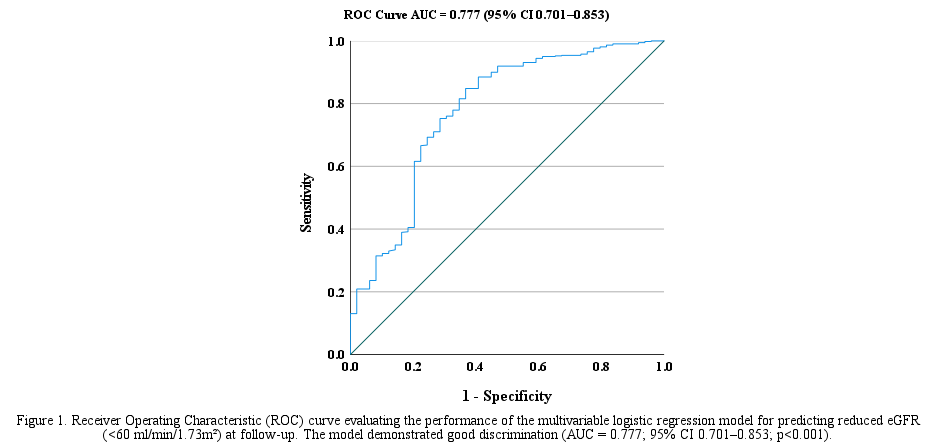


Figure S1. Receiver Operating Characteristic (ROC) curve evaluating the performance of the multivariable logistic regression model for predicting reduce eGFR (<60ml/min/1.73m2) at follow-up. The model demonstrated good discrimination (AUC= 0.777, 95% CI 0.701-0.853; p<0.001).

Table S3. Summary of biochemical and anthropometric measurements employed in the study

| **Measurement** | **Type-Device/**  **Method Used** | **Measurement Site/Sample type** | **Purpose/Notes** | **Certification /Approval** |
| --- | --- | --- | --- | --- |
| **Blood Urea** | Biochemistry Analyzer | Biochemistry Laboratories of the Government District Hospitals in Bikaner and Jaisalmer | Kidney Function Assessment | National Accreditation Certificate for the External Quality Assessment-accredited lab) |
| **Uric Acid** | Biochemistry Analyzer | Biochemistry Laboratories of the Government District Hospitals in Bikaner and Jaisalmer | Kidney Function Assessment | National Accreditation Certificate for the External Quality Assessment-accredited lab) |
| **Haemoglobin** | Cyan-methemoglobin method- Photoelectric Colorimeter | Biochemistry Laboratories of ICMR | Assessed Haemoglobin Level | Labmed Calorimetry |
| **Urinary Creatinine** | Biochemistry Analyzer | Biochemistry Laboratories of the Government District Hospitals in Bikaner and Jaisalmer | Kidney Function Assessment | National Accreditation Certificate for the External Quality Assessment-accredited lab) |
| **Urinary Albumin** | Biochemical | Spot urine | Used to screen for albuminuria | Laura Smart urine analyser (Model EM-200) |
| **Urine Albumin/Creatinine Ratio (ACR)** | Calculated Value - Derived from measured albumin and creatinine | Spot urine | Used to assess microalbuminuria | Laura Smart urine analyser (Model EM-200) |
| **Fasting Blood Glucose** | Biochemical | Finger prick (capillary) | Calibrated daily; measured Randomly | Accu-CHEK  Active Blood Glucose Monitoring |
| **Anthropometry** | stadiometer and digital weighing scale | Stadiometer, digital weighing scale, and non-stretchable measuring tape | **(**height, weight, BMI, and waist circumference) | Standardized measurement protocol (averaging Three readings) |
| **Blood Pressure** | Digital Blood Pressure | Digital Blood Pressure | Blood Pressure | Standardized measurement protocol (averaging Three readings) |

**Multiple Imputation**

| **Coefficientsa** | | | |
| --- | --- | --- | --- |
| Model | | Collinearity Statistics | |
| Tolerance | VIF |
| 1 | EXTRA SALT | .943 | 1.061 |
| FOOD with high salt | .923 | 1.083 |
| DM | .866 | 1.154 |
| BMI | .912 | 1.096 |
| triglyceride | .926 | 1.080 |
| litres of water do you drink per day | .897 | 1.115 |
| water for drinking and cooking | .973 | 1.028 |
| past 12 months, herbal or traditional medicine | .445 | 2.249 |
| taken painkillers for more than 12 months | .439 | 2.275 |
| past 12 months, taken prescription drugs | .688 | 1.454 |
| Education | .907 | 1.103 |
| Occupation | .916 | 1.092 |
| Swelling feet ankles | .923 | 1.084 |
| a. Dependent Variable: eGFR_FUP_RANGE2 | | | |

| **Collinearity Diagnosticsa** | | | | | | | | | | | | | | | | | |
| --- | --- | --- | --- | --- | --- | --- | --- | --- | --- | --- | --- | --- | --- | --- | --- | --- | --- |
| Model | Dimension | Eigenvalue | Condition Index | Variance Proportions | | | | | | | | | | | | | |
| (Constant) | EXTRA SALT | FOOD with high salt | DM | BMI | triglyceride | litres of water do you drink per day | Water for drinking and cooking | past 12 months, herbal or traditional medicine | taken painkillers for more than 12 months | past 12 months, taken prescription drugs | Education | Occupation | Swelling feet ankles |
| 1 | 1 | 12.576 | 1<.001 | .00 | .00 | .00 | .00 | .00 | .00 | .00 | .00 | .00 | .00 | .00 | .00 | .00 | .00 |
| 2 | .389 | 5.683 | .00 | .00 | .00 | .00 | .00 | .00 | .00 | .00 | .00 | .00 | .00 | .83 | .01 | .00 |
| 3 | .225 | 7.478 | .00 | .01 | .02 | .19 | .00 | .00 | .00 | .01 | .00 | .01 | .21 | .00 | .01 | .00 |
| 4 | .137 | 9.587 | .00 | .00 | .05 | .09 | .11 | .17 | .00 | .18 | .01 | .02 | .03 | .01 | .01 | .01 |
| 5 | .118 | 10.312 | .00 | .01 | .05 | .01 | .02 | .18 | .00 | .49 | .00 | .00 | .02 | .02 | .11 | .00 |
| 6 | .107 | 10.850 | .00 | .00 | .02 | .24 | .00 | .06 | .00 | .22 | .00 | .01 | .00 | .02 | .40 | .01 |
| 7 | .099 | 11.244 | .00 | .56 | .16 | .09 | .00 | .01 | .00 | .00 | .00 | .00 | .03 | .00 | .00 | .00 |
| 8 | .095 | 11.511 | .00 | .02 | .41 | .14 | .00 | .05 | .03 | .02 | .00 | .00 | .02 | .05 | .26 | .00 |
| 9 | .073 | 13.158 | .00 | .05 | .02 | .00 | .53 | .45 | .00 | .00 | .00 | .00 | .02 | .00 | .02 | .08 |
| 10 | .063 | 14.184 | .00 | .06 | .02 | .12 | .17 | .00 | .01 | .00 | .02 | .04 | .41 | .00 | .03 | .32 |
| 11 | .058 | 14.761 | .00 | .01 | .02 | .03 | .09 | .02 | .00 | .01 | .06 | .09 | .24 | .05 | .01 | .42 |
| 12 | .038 | 18.170 | .00 | .12 | .13 | .00 | .00 | .00 | .80 | .00 | .02 | .05 | .00 | .00 | .01 | .01 |
| 13 | .016 | 28.194 | .00 | .00 | .00 | .00 | .00 | .00 | .01 | .00 | .87 | .78 | .00 | .00 | .01 | .00 |
| 14 | .007 | 41.791 | 1.00 | .14 | .11 | .09 | .06 | .05 | .13 | .06 | .01 | .00 | .01 | .00 | .11 | .14 |
| a. Dependent Variable: eGFR_FUP_RANGE2 | | | | | | | | | | | | | | | | | |
| A multiple linear regression analysis was performed to identify independent predictors of renal function, as measured by follow-up estimated glomerular filtration rate (eGFR_FUP_60). A listwise deletion approach was applied to handle missing data, and all variables were entered simultaneously using the enter method. Multicollinearity diagnostics, including tolerance and variance inflation factor (VIF), were assessed to ensure the independence of predictors. The regression coefficients were evaluated using standard criteria (PIN = 0.05, POUT = 0.10), and statistical significance was determined at the 5% level. The analysis allowed for the estimation of the independent contribution of each predictor to variations in eGFR, while controlling for potential confounders, thereby providing insight into the relative influence of lifestyle, clinical, and socio-environmental factors on kidney function. | | | | | | | | | | | | | | | | | |

NONPAR CORR

| **Correlations** | | | | | | | | | | | | | | | | |
| --- | --- | --- | --- | --- | --- | --- | --- | --- | --- | --- | --- | --- | --- | --- | --- | --- |
|  | | | Education | Occupation | Swelling feet ankles | FOOD with high salt | EXTRA SALT | DM | HTN | BMI | triglyceride | past 12 months, taken prescription drugs | taken painkillers for more than 12 months | past 12 months, herbal or traditional medicine | water for drinking and cooking | litres of water do you drink per day |
| Kendall's tau_b | Education | Correlation Coefficient | 1<.001 | -.229** | .110** | -.027** | -.001 | .005 | -.034** | -.037** | .034 | .051** | .003 | .001 | .031** | .043** |
| Sig. (2-tailed) | . | <.001 | <.001 | <.001 | .843 | .538 | <.001 | <.001 | .355 | <.001 | .726 | .927 | <.001 | <.001 |
| Occupation | Correlation Coefficient | -.229** | 1<.001 | -.101** | .032** | .007 | <.001 | .044** | .005 | -.055 | -.027** | .013 | .027** | .020** | -.045** |
| Sig. (2-tailed) | <.001 | . | <.001 | <.001 | .377 | .969 | <.001 | .512 | .129 | <.001 | .074 | <.001 | .007 | <.001 |
| Swelling feet ankles | Correlation Coefficient | .110** | -.101** | 1<.001 | -.038** | -.081** | -.085** | -.123** | .113** | .112** | .113** | -.004 | -.019* | -.010 | -.038** |
| Sig. (2-tailed) | <.001 | <.001 | . | <.001 | <.001 | <.001 | <.001 | <.001 | .005 | <.001 | .616 | .021 | .219 | <.001 |
| FOOD with high salt | Correlation Coefficient | -.027** | .032** | -.038** | 1<.001 | .055** | .039** | .060** | -.019* | -.034 | -.057** | -.005 | .020* | .039** | .085** |
| Sig. (2-tailed) | <.001 | <.001 | <.001 | . | <.001 | <.001 | <.001 | .028 | .389 | <.001 | .547 | .017 | <.001 | <.001 |
| EXTRA SALT | Correlation Coefficient | -.001 | .007 | -.081** | .055** | 1<.001 | .027** | .099** | -.060** | -.094* | -.083** | -.012 | -.015 | -.063** | .025** |
| Sig. (2-tailed) | .843 | .377 | <.001 | <.001 | . | .001 | <.001 | <.001 | .019 | <.001 | .133 | .077 | <.001 | .002 |
| DM | Correlation Coefficient | .005 | <.001 | -.085** | .039** | .027** | 1<.001 | .309** | -.087** | -.056 | -.210** | -.028** | -.050** | .016* | -.014 |
| Sig. (2-tailed) | .538 | .969 | <.001 | <.001 | .001 | . | <.001 | <.001 | .155 | <.001 | .001 | <.001 | .040 | .076 |
| HTN | Correlation Coefficient | -.034** | .044** | -.123** | .060** | .099** | .309** | 1<.001 | -.112** | .013 | -.258** | -.018* | -.041** | .005 | -.020* |
| Sig. (2-tailed) | <.001 | <.001 | <.001 | <.001 | <.001 | <.001 | . | <.001 | .739 | <.001 | .032 | <.001 | .527 | .014 |
| BMI | Correlation Coefficient | -.037** | .005 | .113** | -.019* | -.060** | -.087** | -.112** | 1<.001 | .223** | .121** | .023** | .032** | -.010 | -.012 |
| Sig. (2-tailed) | <.001 | .512 | <.001 | .028 | <.001 | <.001 | <.001 | . | <.001 | <.001 | .007 | <.001 | .257 | .149 |
| triglyceride | Correlation Coefficient | .034 | -.055 | .112** | -.034 | -.094* | -.056 | .013 | .223** | 1<.001 | .075* | .012 | -.022 | .002 | -.033 |
| Sig. (2-tailed) | .355 | .129 | .005 | .389 | .019 | .155 | .739 | <.001 | . | .049 | .751 | .577 | .949 | .398 |
| past 12 months, taken prescription drugs | Correlation Coefficient | .051** | -.027** | .113** | -.057** | -.083** | -.210** | -.258** | .121** | .075* | 1<.001 | .491** | .484** | .054** | .176** |
| Sig. (2-tailed) | <.001 | <.001 | <.001 | <.001 | <.001 | <.001 | <.001 | <.001 | .049 | . | <.001 | <.001 | <.001 | <.001 |
| taken painkillers for more than 12 months | Correlation Coefficient | .003 | .013 | -.004 | -.005 | -.012 | -.028** | -.018* | .023** | .012 | .491** | 1<.001 | .717** | .107** | .251** |
| Sig. (2-tailed) | .726 | .074 | .616 | .547 | .133 | .001 | .032 | .007 | .751 | <.001 | . | <.001 | <.001 | <.001 |
| past 12 months, herbal or traditional medicine | Correlation Coefficient | .001 | .027** | -.019* | .020* | -.015 | -.050** | -.041** | .032** | -.022 | .484** | .717** | 1<.001 | .103** | .269** |
| Sig. (2-tailed) | .927 | <.001 | .021 | .017 | .077 | <.001 | <.001 | <.001 | .577 | <.001 | <.001 | . | <.001 | <.001 |
| water for drinking and cooking | Correlation Coefficient | .031** | .020** | -.010 | .039** | -.063** | .016* | .005 | -.010 | .002 | .054** | .107** | .103** | 1<.001 | .006 |
| Sig. (2-tailed) | <.001 | .007 | .219 | <.001 | <.001 | .040 | .527 | .257 | .949 | <.001 | <.001 | <.001 | . | .440 |
| litres of water do you drink per day | Correlation Coefficient | .043** | -.045** | -.038** | .085** | .025** | -.014 | -.020* | -.012 | -.033 | .176** | .251** | .269** | .006 | 1<.001 |
| Sig. (2-tailed) | <.001 | <.001 | <.001 | <.001 | .002 | .076 | .014 | .149 | .398 | <.001 | <.001 | <.001 | .440 | . |
| Spearman's rho | Education | Correlation Coefficient | 1<.001 | -.279** | .123** | -.030** | -.002 | .005 | -.039** | -.042** | .037 | .060** | .003 | .001 | .037** | .050** |
| Sig. (2-tailed) | . | <.001 | <.001 | <.001 | .843 | .538 | <.001 | <.001 | .355 | <.001 | .736 | .928 | <.001 | <.001 |
| Occupation | Correlation Coefficient | -.279** | 1<.001 | -.110** | .035** | .007 | <.001 | .048** | .006 | -.061 | -.031** | .015 | .030** | .023** | -.051** |
| Sig. (2-tailed) | <.001 | . | <.001 | <.001 | .377 | .970 | <.001 | .512 | .129 | <.001 | .075 | <.001 | .008 | <.001 |
| Swelling feet ankles | Correlation Coefficient | .123** | -.110** | 1<.001 | -.038** | -.081** | -.086** | -.124** | .113** | .112** | .119** | -.004 | -.019* | -.010 | -.039** |
| Sig. (2-tailed) | <.001 | <.001 | . | <.001 | <.001 | <.001 | <.001 | <.001 | .005 | <.001 | .616 | .021 | .219 | <.001 |
| FOOD with high salt | Correlation Coefficient | -.030** | .035** | -.038** | 1<.001 | .055** | .039** | .061** | -.019* | -.034 | -.060** | -.005 | .020* | .041** | .089** |
| Sig. (2-tailed) | <.001 | <.001 | <.001 | . | <.001 | <.001 | <.001 | .028 | .390 | <.001 | .547 | .017 | <.001 | <.001 |
| EXTRA SALT | Correlation Coefficient | -.002 | .007 | -.081** | .055** | 1<.001 | .027** | .099** | -.060** | -.094* | -.088** | -.013 | -.015 | -.067** | .026** |
| Sig. (2-tailed) | .843 | .377 | <.001 | <.001 | . | .001 | <.001 | <.001 | .019 | <.001 | .133 | .077 | <.001 | .002 |
| DM | Correlation Coefficient | .005 | <.001 | -.086** | .039** | .027** | 1<.001 | .311** | -.088** | -.057 | -.222** | -.028** | -.050** | .017* | -.015 |
| Sig. (2-tailed) | .538 | .970 | <.001 | <.001 | .001 | . | <.001 | <.001 | .155 | <.001 | .001 | <.001 | .040 | .076 |
| HTN | Correlation Coefficient | -.039** | .048** | -.124** | .061** | .099** | .311** | 1<.001 | -.113** | .013 | -.273** | -.018* | -.041** | .005 | -.021* |
| Sig. (2-tailed) | <.001 | <.001 | <.001 | <.001 | <.001 | <.001 | . | <.001 | .739 | <.001 | .032 | <.001 | .527 | .014 |
| BMI | Correlation Coefficient | -.042** | .006 | .113** | -.019* | -.060** | -.088** | -.113** | 1<.001 | .223** | .128** | .024** | .032** | -.010 | -.013 |
| Sig. (2-tailed) | <.001 | .512 | <.001 | .028 | <.001 | <.001 | <.001 | . | <.001 | <.001 | .007 | <.001 | .257 | .149 |
| triglyceride | Correlation Coefficient | .037 | -.061 | .112** | -.034 | -.094* | -.057 | .013 | .223** | 1<.001 | .079* | .013 | -.022 | .003 | -.034 |
| Sig. (2-tailed) | .355 | .129 | .005 | .390 | .019 | .155 | .739 | <.001 | . | .049 | .751 | .577 | .949 | .399 |
| past 12 months, taken prescription drugs | Correlation Coefficient | .060** | -.031** | .119** | -.060** | -.088** | -.222** | -.273** | .128** | .079* | 1<.001 | .518** | .509** | .060** | .192** |
| Sig. (2-tailed) | <.001 | <.001 | <.001 | <.001 | <.001 | <.001 | <.001 | <.001 | .049 | . | <.001 | <.001 | <.001 | <.001 |
| taken painkillers for more than 12 months | Correlation Coefficient | .003 | .015 | -.004 | -.005 | -.013 | -.028** | -.018* | .024** | .013 | .518** | 1<.001 | .730** | .115** | .267** |
| Sig. (2-tailed) | .736 | .075 | .616 | .547 | .133 | .001 | .032 | .007 | .751 | <.001 | . | <.001 | <.001 | <.001 |
| past 12 months, herbal or traditional medicine | Correlation Coefficient | .001 | .030** | -.019* | .020* | -.015 | -.050** | -.041** | .032** | -.022 | .509** | .730** | 1<.001 | .110** | .282** |
| Sig. (2-tailed) | .928 | <.001 | .021 | .017 | .077 | <.001 | <.001 | <.001 | .577 | <.001 | <.001 | . | <.001 | <.001 |
| past 12 months, herbal or traditional medicine | Correlation Coefficient | .037** | .023** | -.010 | .041** | -.067** | .017* | .005 | -.010 | .003 | .060** | .115** | .110** | 1<.001 | .006 |
| Sig. (2-tailed) | <.001 | .008 | .219 | <.001 | <.001 | .040 | .527 | .257 | .949 | <.001 | <.001 | <.001 | . | .452 |
| How many litres of water do you drink per day? | Correlation Coefficient | .050** | -.051** | -.039** | .089** | .026** | -.015 | -.021* | -.013 | -.034 | .192** | .267** | .282** | .006 | 1<.001 |
| Sig. (2-tailed) | <.001 | <.001 | <.001 | <.001 | .002 | .076 | .014 | .149 | .399 | <.001 | <.001 | <.001 | .452 | . |
| **. Correlation is significant at the 0.01 level (2-tailed). | | | | | | | | | | | | | | | | |
| *. Correlation is significant at the 0.05 level (2-tailed). | | | | | | | | | | | | | | | | |
| A non-parametric correlation analysis was conducted to assess the associations among socio-demographic (education, occupation), clinical (swelling of extremities, dmg1, hypertension, BMI categories, triglyceride levels), behavioral (food and salt intake), medication-related (prescription drug use, long-term painkiller use, and herbal/traditional medicine), and environmental factors (water source and daily water consumption). Spearman’s rank-order correlation coefficients (ρ) were computed using two-tailed tests, and missing data were handled through pairwise deletion. Both Pearson’s and Spearman’s coefficients were examined for comparison, with emphasis on the non-parametric estimates due to potential non-normality and ordinal measurement levels of several variables. The results indicated statistically significant monotonic relationships among multiple variables, although the majority of correlations were of weak to moderate strength. Notably, stronger associations were observed among medication use variables and between metabolic indicators, suggesting clustering of health conditions and treatment behaviors. Overall, the findings provide robust evidence of interrelationships across demographic, clinical, and lifestyle domains without assuming normal distribution of the data. | | | | | | | | | | | | | | | | |

CORRELATIONS

| **Correlations** | | | | | | | | | | | | | | | |
| --- | --- | --- | --- | --- | --- | --- | --- | --- | --- | --- | --- | --- | --- | --- | --- |
|  | | Education | Occupation | Swelling feet ankles | FOOD with high salt | EXTRA SALT | DM | HTN | BMI | triglyceride | past 12 months, taken prescription drugs | taken painkillers for more than 12 months | past 12 months, herbal or traditional medicine | water for drinking and cooking | litres of water do you drink per day |
| Education | Pearson Correlation | - | -.230** | .121** | -.032** | .005 | .018* | -.032** | -.033** | .033 | .066** | .015 | .010 | .045** | .057** |
| Sig. (2-tailed) |  | <.001 | <.001 | <.001 | .551 | .031 | <.001 | <.001 | .415 | <.001 | .072 | .252 | <.001 | <.001 |
| Occupation | Pearson Correlation | -.230** | 1 | -.101** | .035** | .005 | -.009 | .035** | .024** | -.052 | -.019* | .014 | .035** | .015 | -.043** |
| Sig. (2-tailed) | <.001 |  | <.001 | <.001 | .591 | .283 | <.001 | .006 | .195 | .022 | .086 | <.001 | .074 | <.001 |
| Swelling feet ankles | Pearson Correlation | .121** | -.101** | 1 | -.038** | -.081** | -.076** | -.117** | .113** | .112** | .125** | .014 | -.003 | -.008 | -.034** |
| Sig. (2-tailed) | <.001 | <.001 |  | <.001 | <.001 | <.001 | <.001 | <.001 | .005 | <.001 | .097 | .690 | .367 | <.001 |
| FOOD with high salt | Pearson Correlation | -.032** | .035** | -.038** | 1 | .055** | .033** | .059** | -.019* | -.034 | -.062** | -.012 | .013 | .042** | .092** |
| Sig. (2-tailed) | <.001 | <.001 | <.001 |  | <.001 | <.001 | <.001 | .028 | .390 | <.001 | .140 | .120 | <.001 | <.001 |
| EXTRA SALT | Pearson Correlation | .005 | .005 | -.081** | .055** | 1 | .023** | .095** | -.060** | -.094* | -.091** | -.017* | -.021* | -.069** | .025** |
| Sig. (2-tailed) | .551 | .591 | <.001 | <.001 |  | .006 | <.001 | <.001 | .019 | <.001 | .041 | .014 | <.001 | .003 |
| DM | Pearson Correlation | .018* | -.009 | -.076** | .033** | .023** | 1 | .323** | -.079** | -.066 | -.215** | -.026** | -.053** | .017* | -.011 |
| Sig. (2-tailed) | .031 | .283 | <.001 | <.001 | .006 |  | <.001 | <.001 | .100 | <.001 | .002 | <.001 | .048 | .173 |
| HTN | Pearson Correlation | -.032** | .035** | -.117** | .059** | .095** | .323** | 1 | -.109** | .014 | -.266** | -.016 | -.041** | .004 | -.016 |
| Sig. (2-tailed) | <.001 | <.001 | <.001 | <.001 | <.001 | <.001 |  | <.001 | .720 | <.001 | .053 | <.001 | .604 | .061 |
| BMI | Pearson Correlation | -.033** | .024** | .113** | -.019* | -.060** | -.079** | -.109** | 1 | .223** | .130** | .024** | .035** | -.010 | -.016 |
| Sig. (2-tailed) | <.001 | .006 | <.001 | .028 | <.001 | <.001 | <.001 |  | <.001 | <.001 | .006 | <.001 | .285 | .076 |
| triglyceride | Pearson Correlation | .033 | -.052 | .112** | -.034 | -.094* | -.066 | .014 | .223** | 1 | .068 | .021 | -.013 | -.006 | -.041 |
|  | Sig. (2-tailed) | .415 | .195 | .005 | .390 | .019 | .100 | .720 | <.001 |  | .087 | .608 | .754 | .877 | .306 |
| past 12 months, taken prescription drugs | Pearson Correlation | .066** | -.019* | .125** | -.062** | -.091** | -.215** | -.266** | .130** | .068 | 1 | .492** | .494** | .059** | .180** |
| Sig. (2-tailed) | <.001 | .022 | <.001 | <.001 | <.001 | <.001 | <.001 | <.001 | .087 |  | <.001 | <.001 | <.001 | <.001 |
| taken painkillers for more than 12 months | Pearson Correlation | .015 | .014 | .014 | -.012 | -.017* | -.026** | -.016 | .024** | .021 | .492** | 1 | .696** | .110** | .236** |
| Sig. (2-tailed) | .072 | .086 | .097 | .140 | .041 | .002 | .053 | .006 | .608 | <.001 |  | <.001 | <.001 | <.001 |
| past 12 months, herbal or traditional medicine | Pearson Correlation | .010 | .035** | -.003 | .013 | -.021* | -.053** | -.041** | .035** | -.013 | .494** | .696** | 1 | .107** | .261** |
| Sig. (2-tailed) | .252 | <.001 | .690 | .120 | .014 | <.001 | <.001 | <.001 | .754 | <.001 | <.001 |  | <.001 | <.001 |
| water for drinking and cooking | Pearson Correlation | .045** | .015 | -.008 | .042** | -.069** | .017* | .004 | -.010 | -.006 | .059** | .110** | .107** | 1 | .006 |
| Sig. (2-tailed) | <.001 | .074 | .367 | <.001 | <.001 | .048 | .604 | .285 | .877 | <.001 | <.001 | <.001 |  | .480 |
| litres of water do you drink per day | Pearson Correlation | .057** | -.043** | -.034** | .092** | .025** | -.011 | -.016 | -.016 | -.041 | .180** | .236** | .261** | .006 | 1 |
| Sig. (2-tailed) | <.001 | <.001 | <.001 | <.001 | .003 | .173 | .061 | .076 | .306 | <.001 | <.001 | <.001 | .480 |  |
| **. Correlation is significant at the 0.01 level (2-tailed). | | | | | | | | | | | | | | | |
| *. Correlation is significant at the 0.05 level (2-tailed). | | | | | | | | | | | | | | | |
| A Pearson’s correlation analysis was conducted to examine the relationships among socio-demographic, clinical, behavioral, and environmental variables, including education, occupation, swelling of extremities, dietary factors (food and salt intake), disease conditions (dmg1 and hypertension), BMI categories, triglyceride levels, medication use patterns, water source, and daily water consumption. Correlations were estimated using a two-tailed test with pairwise deletion to handle missing data. | | | | | | | | | | | | | | | |

**Abbreviation**

ACR : Albumin-to-Creatinine Ratio

AOR : Adjusted Odds Ratio

BMI : Body Mass Index

CGA : Combined Risk Grouping Category

CKD : Chronic Kidney Disease

CKD-EPI : Chronic Kidney Disease Epidemiology Collaboration Estimated

CI : Confidence interval

DM : Diabetes Mellitus

ESRD : End-Stage Renal Disease

GBD : Global Burden of Disease

GFR : Glomerular Filtration Rate

HDL-C : High-Density Lipoprotein Cholesterol

HTN : Hypertension

KIDGO : Kidney Disease: Improving Global Outcomes

LDL-C : Low-Density Lipoprotein Cholesterol

NSAIDs : Nonsteroidal anti-inflammatory drugs
